# Supplementary material
Source: publisher figshare collection journal article supplement (https://karger.figshare.com/ndownloader/files/12270506)
Supplement: Supplementary file 1 [file 12270506]

**Supplementary material 1**

Genotypes, allele counts and frequency distributions of rs6275 and rs1799978 polymorphisms of DRD2 gene: suicide attempters and control group in a Mexican population.

| Genotypes | Cases | | Controls | | X2 | df | *P* | Alleles | Cases | | Controls | | X2 | df | *P* | OR | 95% CI |
| --- | --- | --- | --- | --- | --- | --- | --- | --- | --- | --- | --- | --- | --- | --- | --- | --- | --- |
|  | n | % | n | % |  |  |  |  | n | % | n | % |  |  |  |  |  |
| rs6275 |  | |  | |  |  |  |  |  | |  | |  |  |  |  |  |
| CC | 20 | 12 | 35 | 29 |  |  |  | C | 121 | 36 | 117 | 48 | 7.20 | 1 | 0.007 | 0.63 | 0.45-0.88 |
| CT | 81 | 49 | 47 | 38 | 12.43 | 2 | **0.002** | T | 211 | 64 | 129 | 52 |  |  |  |  |  |
| TT | 65 | 39 | 41 | 33 |  |  |  |  |  | |  | |  |  |  |  |  |
| rs1799978 |  |  |  |  |  |  |  |  |  | |  | |  |  |  |  |  |
| CC | 7 | 4 | 6 | 5 | 0.74 | 2 | 0.68 | C | 46 | 14 | 31 | 13 | 0.19 | 1 | 0.66 | 1.11 | 0.68-1.8 |
| CT | 32 | 19 | 19 | 15 |  |  |  | T | 286 | 86 | 215 | 87 |  |  |  |  |  |
| TT | 127 | 77 | 98 | 80 |  |  |  |  |  | |  | |  |  |  |  |  |

Statistically significant values are presented in bold (p<0.05).
